# Supplementary material
Source: PubMed Central journal article supplement (PMC10445230)
Supplement: NIHMS1906957-supplement-1.pdf [file NIHMS1906957-supplement-1.pdf]

### Experiment 1

#### Cold\_animal\_1

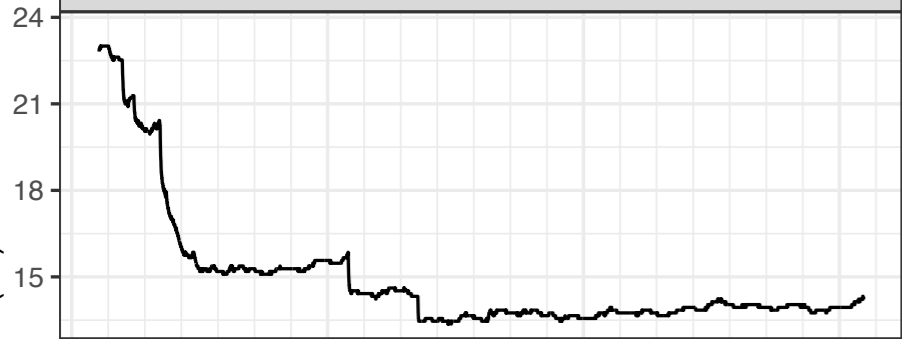

#### Cold\_animal\_2

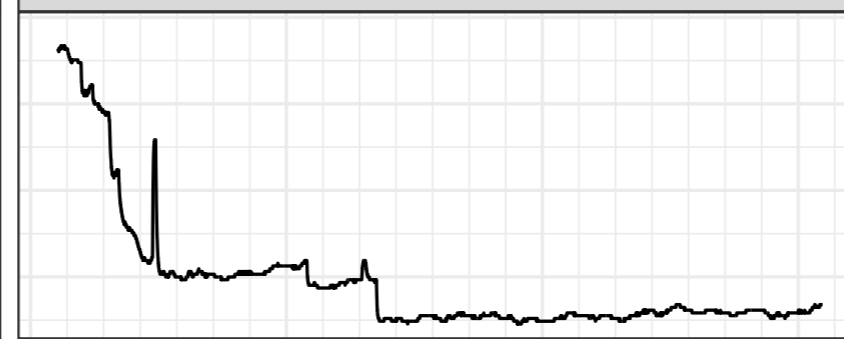

#### Cold\_animal\_3

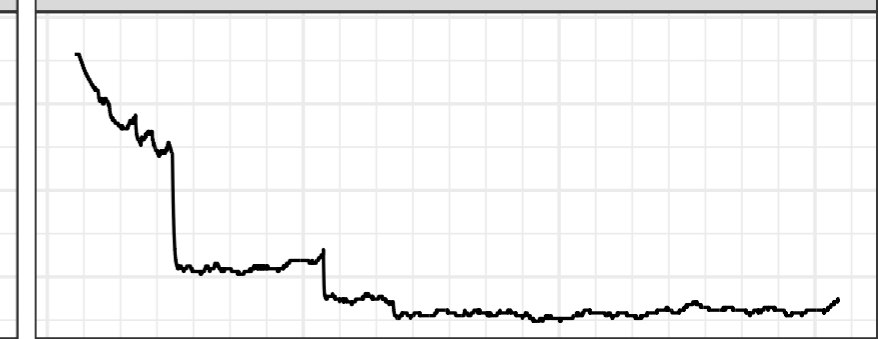

#### Warm\_animal\_1

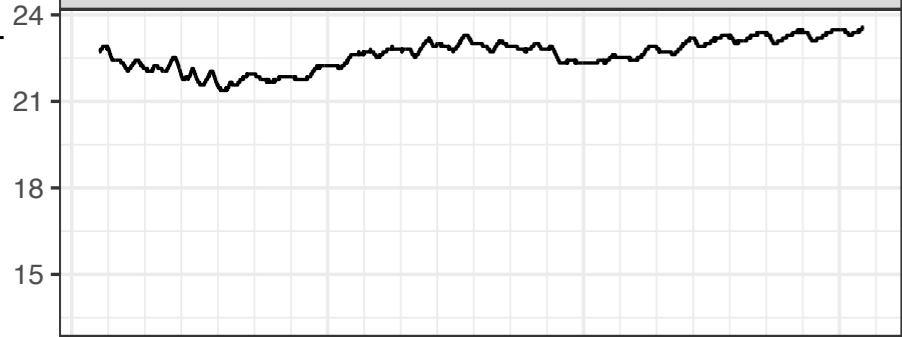

#### Warm\_animal\_2

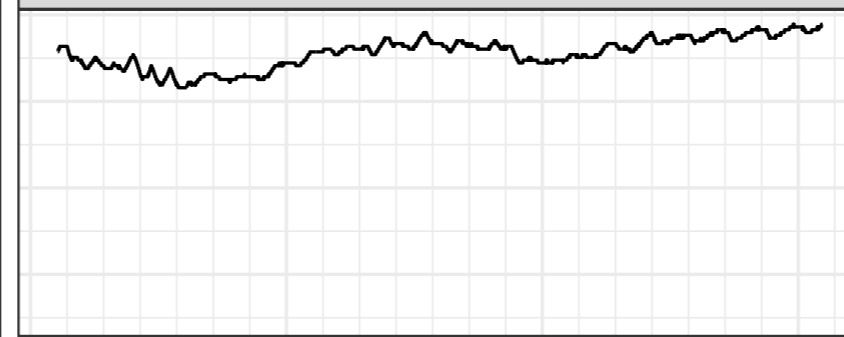

#### Warm\_animal\_3

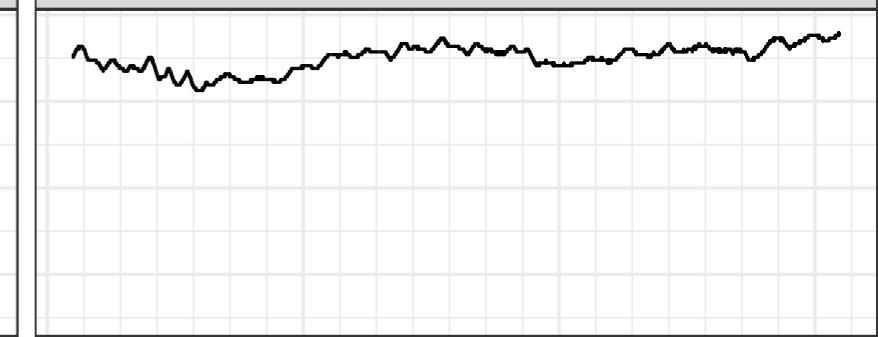

Date

### Experiment 2

#### Cold\_animal\_4

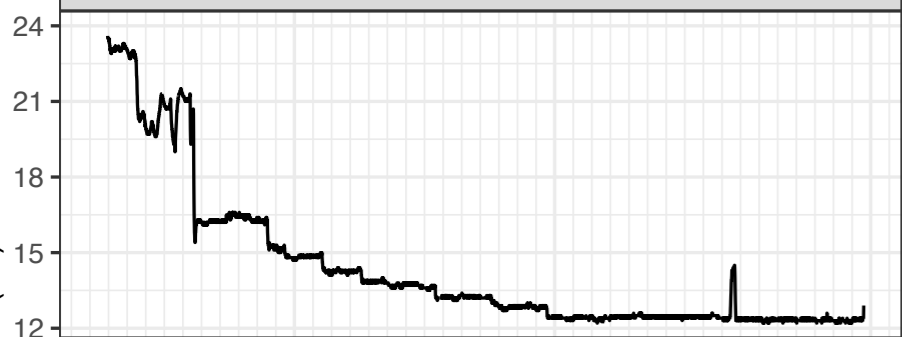

#### Cold\_animal\_5

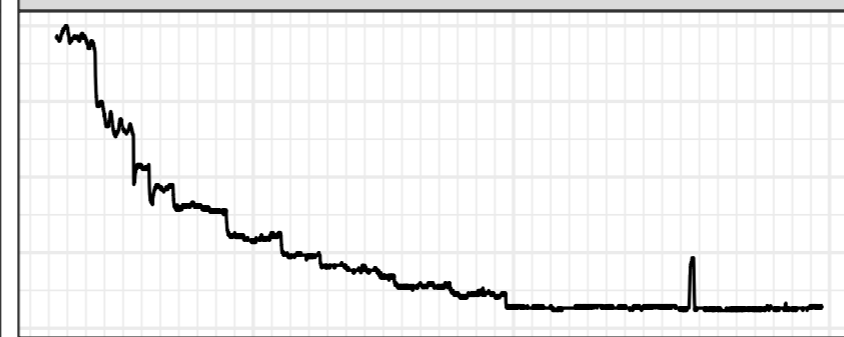

#### Cold\_animal\_6

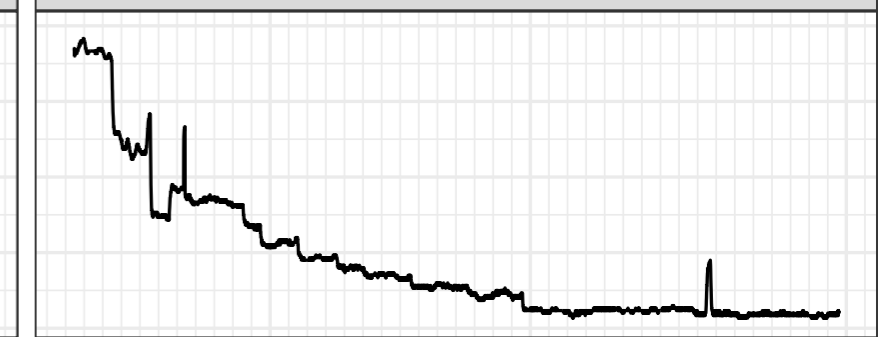

#### Warm\_animal\_4

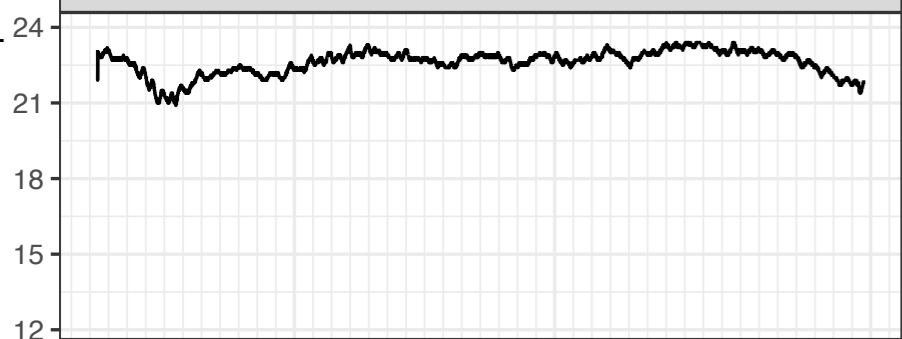

#### Warm\_animal\_5

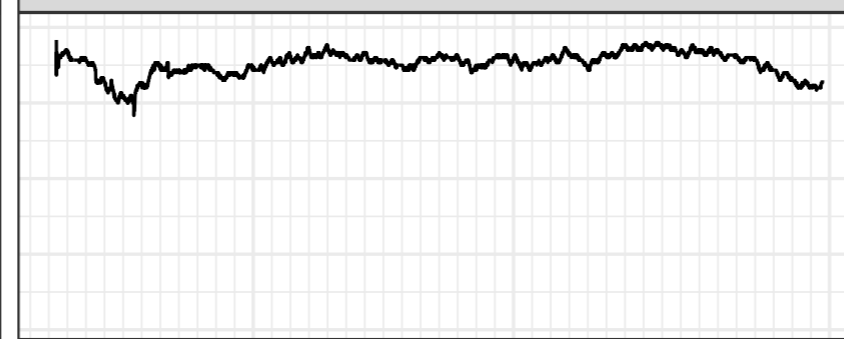

#### Warm\_animal\_6

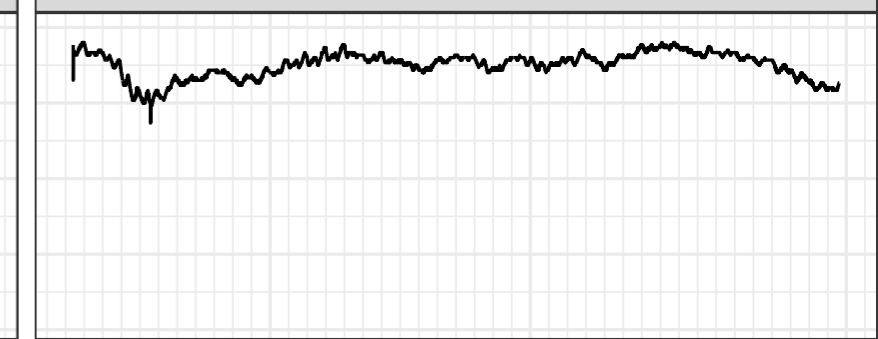

Date
