# Supplementary material
Source: PubMed Central journal article supplement (PMC10445230)
Supplement: NIHMS1906957-supplement-6.pdf [file NIHMS1906957-supplement-6.pdf]

- **File S1: Primers for amplicon sequencing of highly cold-induced editing sites and cytochrome c oxidase I (for species identification). Related to Figures 3 and 6.**
- Cytoplasmic\_dynein\_1\_heavy\_chain\_1 (Ocbimv22033392m)
  - Editing site(s):
    - 2384 ( $\Delta$ 37% editing in RNASeq-based analysis)
  - Fwd: CGCAATTTACGATGGCTGGG
  - Rev & Sanger: ATTCCACATCAAGCCCCACC
  - Amplicon size: 634 bp
- Kinesin\_heavy\_chain\_isoform\_5A (Ocbimv22000619m)
  - Editing site(s):
    - 845 ( $\Delta$ 29% editing)
      - Genomic coordinate: Scaffold10378:107063
  - Fwd: GTTAAGGGAGCAACAGAGAG
  - Rev & Sanger: CGTGCCAATGTAGCCTTC
  - Amplicon size: 590 bp
- Synaptotagmin-1 (Ocbimv22021175m)
  - Editing site(s):
    - 741 ( $\Delta$ 25% editing)
    - 742 ( $\Delta$ 24% editing)
      - Genomic coordinate: Scaffold311:554700
  - Fwd: CGTCAAAGTCTATCTAATGCCCG
  - Rev & Sanger: ATTCTTCTCGGGCACTTC
  - Amplicon size: 712 bp
- Titin-like (Ocbimv22028814m)
  - Segment 1
    - Editing site(s):
      - 3635 ( $\Delta$ 28% editing)
      - 3636 ( $\Delta$ 31% editing)
      - 3646 ( $\Delta$ 28% editing)
      - 3647 ( $\Delta$ 14% editing)
      - 3660 ( $\Delta$ 16% editing)
    - Fwd: CGGACCCTAAAGATAAGGC
    - Rev & Sanger: CTAGTTGTGTCTGAAGGC
    - Amplicon size: 636 bp
  - Segment 2
    - Editing site(s):
      - 6350 ( $\Delta$ 11% editing)
      - 6598 ( $\Delta$ 26% editing)
      - 6664 ( $\Delta$ 17% editing)
    - Fwd: GCATAGTGAAGTGAAGGG
    - Rev & Sanger: GGTGTTGGCTCTTTGAAGGG
    - Amplicon size: 810 bp
  - Segment 3
    - Editing site(s):
      - 8774 ( $\Delta$ 23% editing)
      - 8784 ( $\Delta$ 35% editing)
      - 8934 ( $\Delta$ 17% editing)

- Fwd: TAATAACGGCTGCGAAGG
  - Rev & Sanger: GGAAGATAAACGTTCCGCTC
  - Amplicon size: 665 bp
- Segment 4
  - Editing site(s):
    - 15116 ( $\Delta$ 14% editing)
    - 15330 ( $\Delta$ 26% editing)
    - 15432 ( $\Delta$ 13% editing)
  - Fwd: GATGCTCATTCCGGTTCAGC
  - Rev & Sanger: GGTGTGACCCACAGTACCA
  - Amplicon size: 660 bp
- Cytochrome c oxidase I
  - Fwd: TTCGAACAGAATTAGGTCAAC
  - Rev & Sanger: AATTTTCGATCAGTTAAAAGTATTG
  - Amplicon size: 534 bp

**Table S5: Pairwise comparisons of the change in editing level (EL) among all 18 sites at each timepoint during the warm-to-cold and cold-to-warm timelapse experiments. Related to Figure 3.**

Warm-to-cold (24° →14°)

| Time 1* | Time 2* | Average ΔEL | P-value     | Bonferroni-adjusted p-value |
|---------|---------|-------------|-------------|-----------------------------|
| -20     | 24      | 9.17500762  | 9.94E-05    | 0.00029811                  |
| 24      | 48      | 6.00995749  | 0.009358025 | 0.028074076                 |
| 48      | 96      | 5.416140318 | 0.001088504 | 0.003265513                 |

Cold-to-warm (14° →24°)

| Time 1* | Time 2* | Average ΔEL | P-value     | Bonferroni-adjusted p-value |
|---------|---------|-------------|-------------|-----------------------------|
| -20     | 0       | -4.42390715 | 0.000304709 | 0.001218836                 |
| 0       | 8       | -0.29464479 | 0.73539669  | 1                           |
| 8       | 24      | -5.35957329 | 0.00010478  | 0.000419122                 |
| 24      | 96      | -12.7316026 | 3.94E-06    | 1.58E-05                    |

\* All time comparisons are expressed in hours relative to the end of the temperature change. Temperature was changed at 0.5°C per hour for 20 hours, so “-20” is immediately before the start of the change and “0” is immediately at the end of the change.

**Table S6: Statistics for wild-type and I248V edited *Octopus* synaptotagmin-1 crystal structures. Related to Figure 5.**

|                                              | <i>Octopus</i> Syt1 C2A (wild type)           | <i>Octopus</i> Syt1 C2A (I248V)            |
|----------------------------------------------|-----------------------------------------------|--------------------------------------------|
| <b>Wavelength (Å)</b>                        | 1.5418                                        | 1.5418                                     |
| <b>Resolution Range (Å)</b>                  | 33.4 – 1.85 (1.92 – 1.85)                     | 41.5 – 1.95 (2.02 – 1.95)                  |
| <b>Space Group</b>                           | P2 <sub>1</sub> 2 <sub>1</sub> 2 <sub>1</sub> | P2 <sub>1</sub>                            |
| <b>Unit Cell (Å, °)</b>                      | 28.73, 54.94, 84.14,<br>90°,90°,90°           | 43.92, 49.42, 71.71,<br>90°, 106.278°, 90° |
| <b>Total Reflections</b>                     | 63769 (2508)                                  | 64727 (1993)                               |
| <b>Unique Reflections</b>                    | 11556 (878)                                   | 20325 (887)                                |
| <b>Multiplicity</b>                          | 5.5 (2.8)                                     | 3.2 (1.6)                                  |
| <b>Completeness (%)</b>                      | 96.45 (74.60)                                 | 82.93 (40.92)                              |
| <b>Mean I/σI</b>                             | 13.09 (0.91)                                  | 7.09 (0.90)                                |
| <b>Wilson B-factor (Å<sup>2</sup>)</b>       | 34.35                                         | 21.99                                      |
| <b>R<sub>merge</sub></b>                     | 0.08502 (0.8457)                              | 0.1118 (0.6204)                            |
| <b>R<sub>meas</sub></b>                      | 0.09341 (1.004)                               | 0.1324 (0.8148)                            |
| <b>R<sub>pim</sub></b>                       | 0.03807 (0.5266)                              | 0.07007 (0.5216)                           |
| <b>CC<sub>1/2</sub></b>                      | 0.997 (0.58)                                  | 0.995 (0.62)                               |
| <b>CC*</b>                                   | 0.999 (0.857)                                 | 0.999 (0.875)                              |
|                                              |                                               |                                            |
| <b>Reflections used in Refinement</b>        | 11528 (878)                                   | 18036 (879)                                |
| <b>Reflections used for R<sub>free</sub></b> | 0.2210 (0.3895)                               | 1792 (85)                                  |
| <b>R<sub>work</sub></b>                      | 0.1786 (0.4018)                               | 0.1761 (0.3273)                            |
| <b>R<sub>free</sub></b>                      | 0.2210 (0.3895)                               | 0.2126 (0.3415)                            |
| <b>CC<sub>work</sub></b>                     | 0.967 (0.745)                                 | 0.972 (0.741)                              |
| <b>CC<sub>free</sub></b>                     | 0.942 (0.867)                                 | 0.961 (0.738)                              |
| <b>Number of non-Hydrogen atoms</b>          | 1075                                          | 2283                                       |
| <b>Macromolecules</b>                        | 1043                                          | 2135                                       |
| <b>ligands</b>                               | 0                                             | 0                                          |
| • solvent                                    | 32                                            | 148                                        |
| • protein residues                           | 128 (1 C2A domain in ASU)                     | 260 (2 C2A domains in ASU)                 |
| <b>RMS (bonds) (Å)</b>                       | 0.008                                         | 0.010                                      |
| <b>RMS (angles) (°)</b>                      | 0.081                                         | 1.17                                       |
| <b>Ramachandran favored (%)</b>              | 99.21                                         | 97.27                                      |
| <b>Ramachandran allowed (%)</b>              | 0.79                                          | 2.73                                       |
| <b>Ramachandran outliers (%)</b>             | 0.00                                          | 0.00                                       |
| <b>Rotamer outliers (%)</b>                  | 0.00                                          | 1.65                                       |
| <b>Clashscore</b>                            | 5.8                                           | 6.60                                       |
| <b>Average B-factor (Å<sup>2</sup>)</b>      | 45.29                                         | 35.36                                      |
| • Macromolecule (Å <sup>2</sup> )            | 45.26                                         | 35.17                                      |
| • Solvent (Å <sup>2</sup> )                  | 46.30                                         | 38.12                                      |
| <b>Number of TLS groups</b>                  | 7                                             | 10                                         |
