# Supplementary material
Source: PubMed Central journal article supplement (PMC10445230)

**A**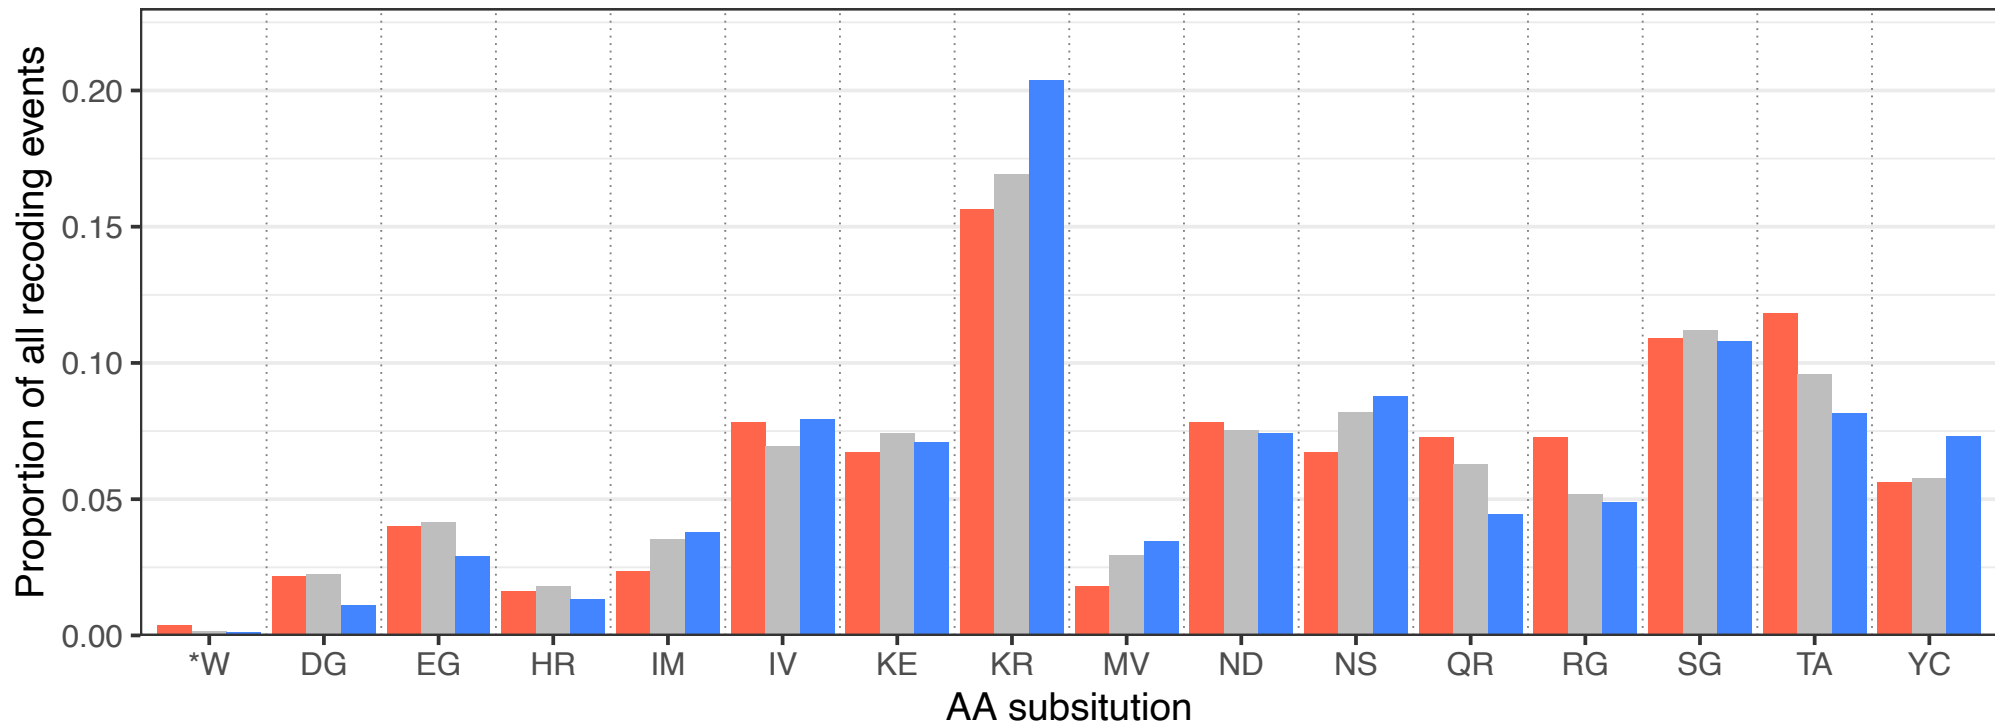**B**

| Nonpolar<br>ACFGILMPVW | Polar<br>NQSTY |
|------------------------|----------------|
| (+)<br>HKR             | (-)<br>DE      |

Supplement: NIHMS1906957-supplement-2.pdf [file NIHMS1906957-supplement-2.pdf]

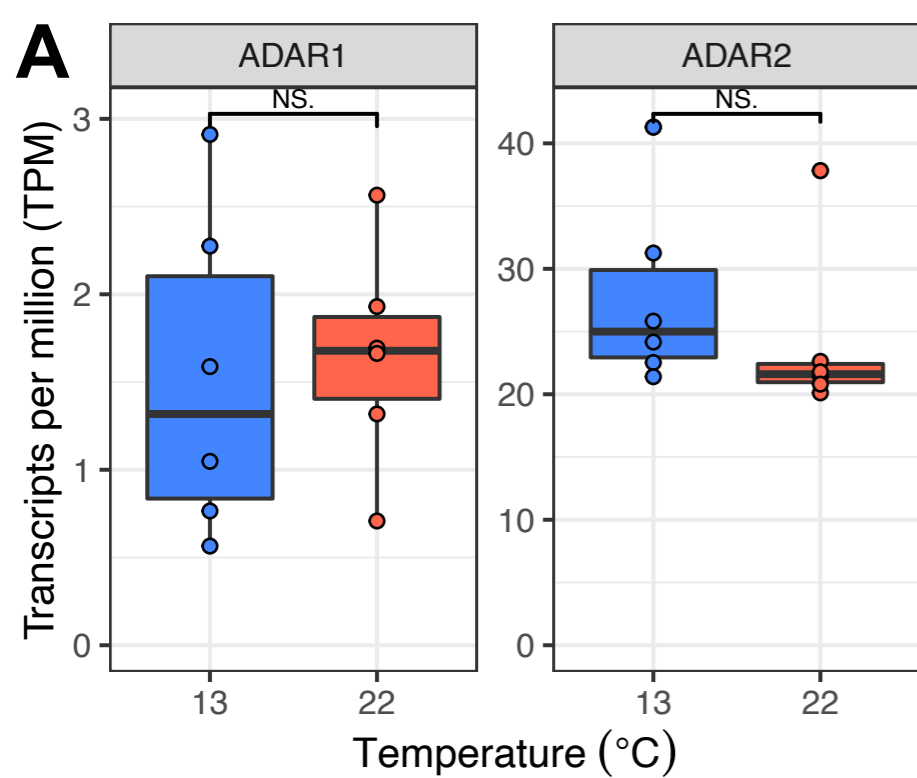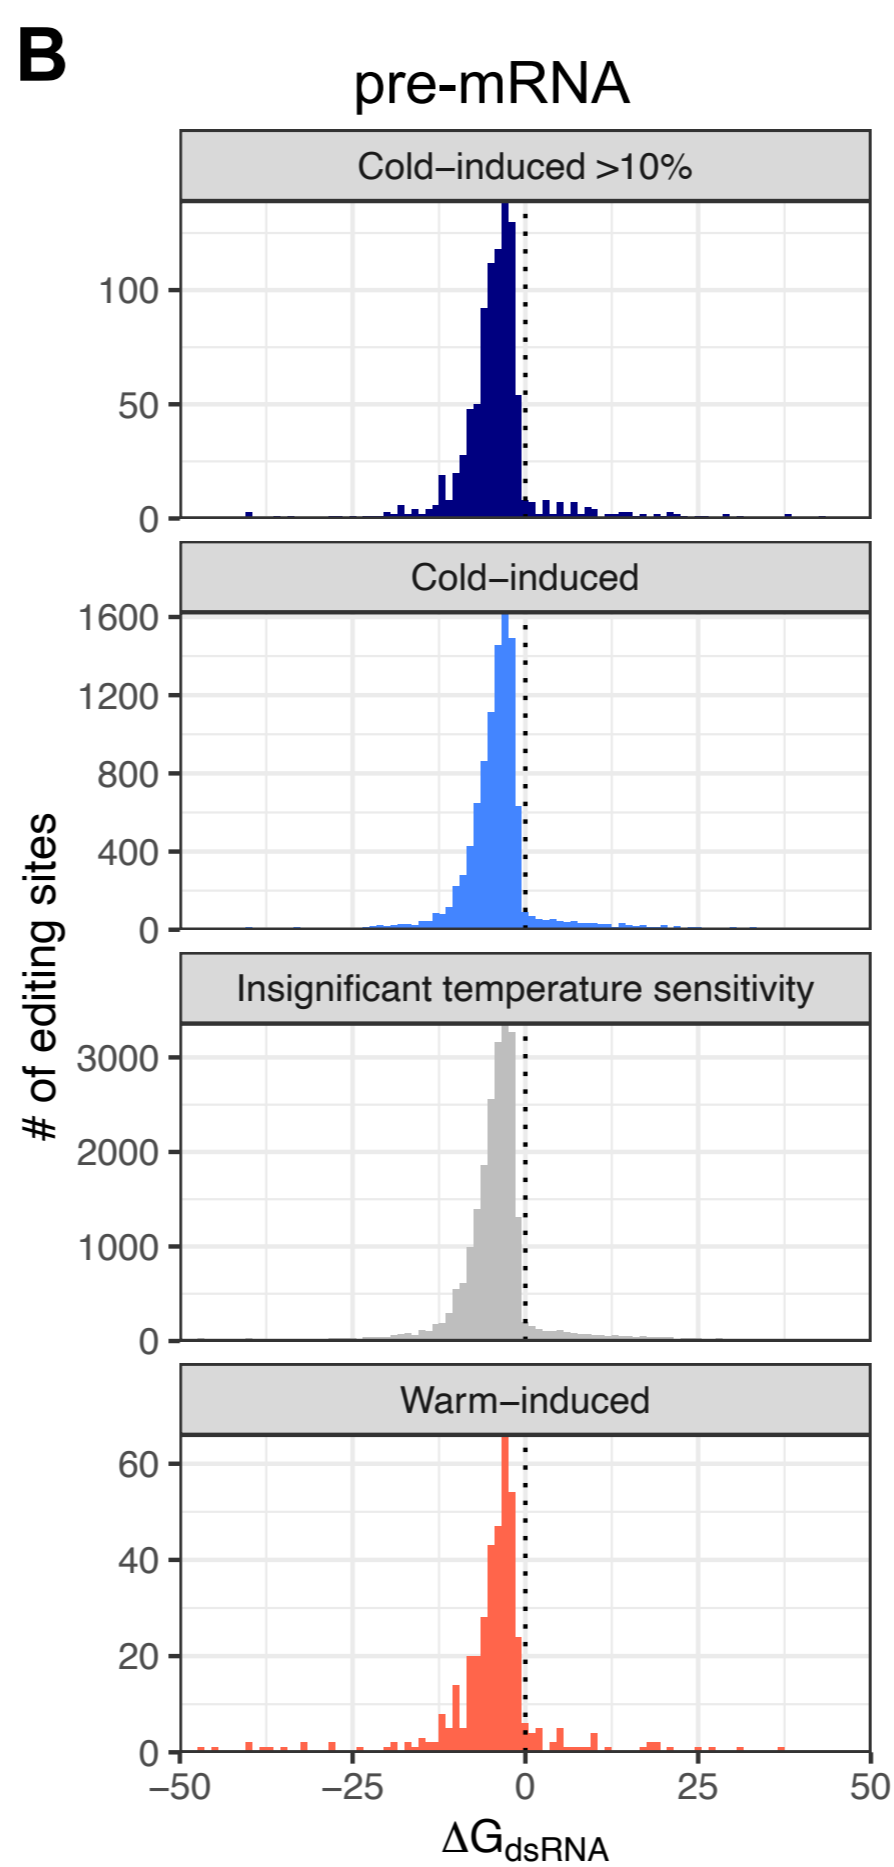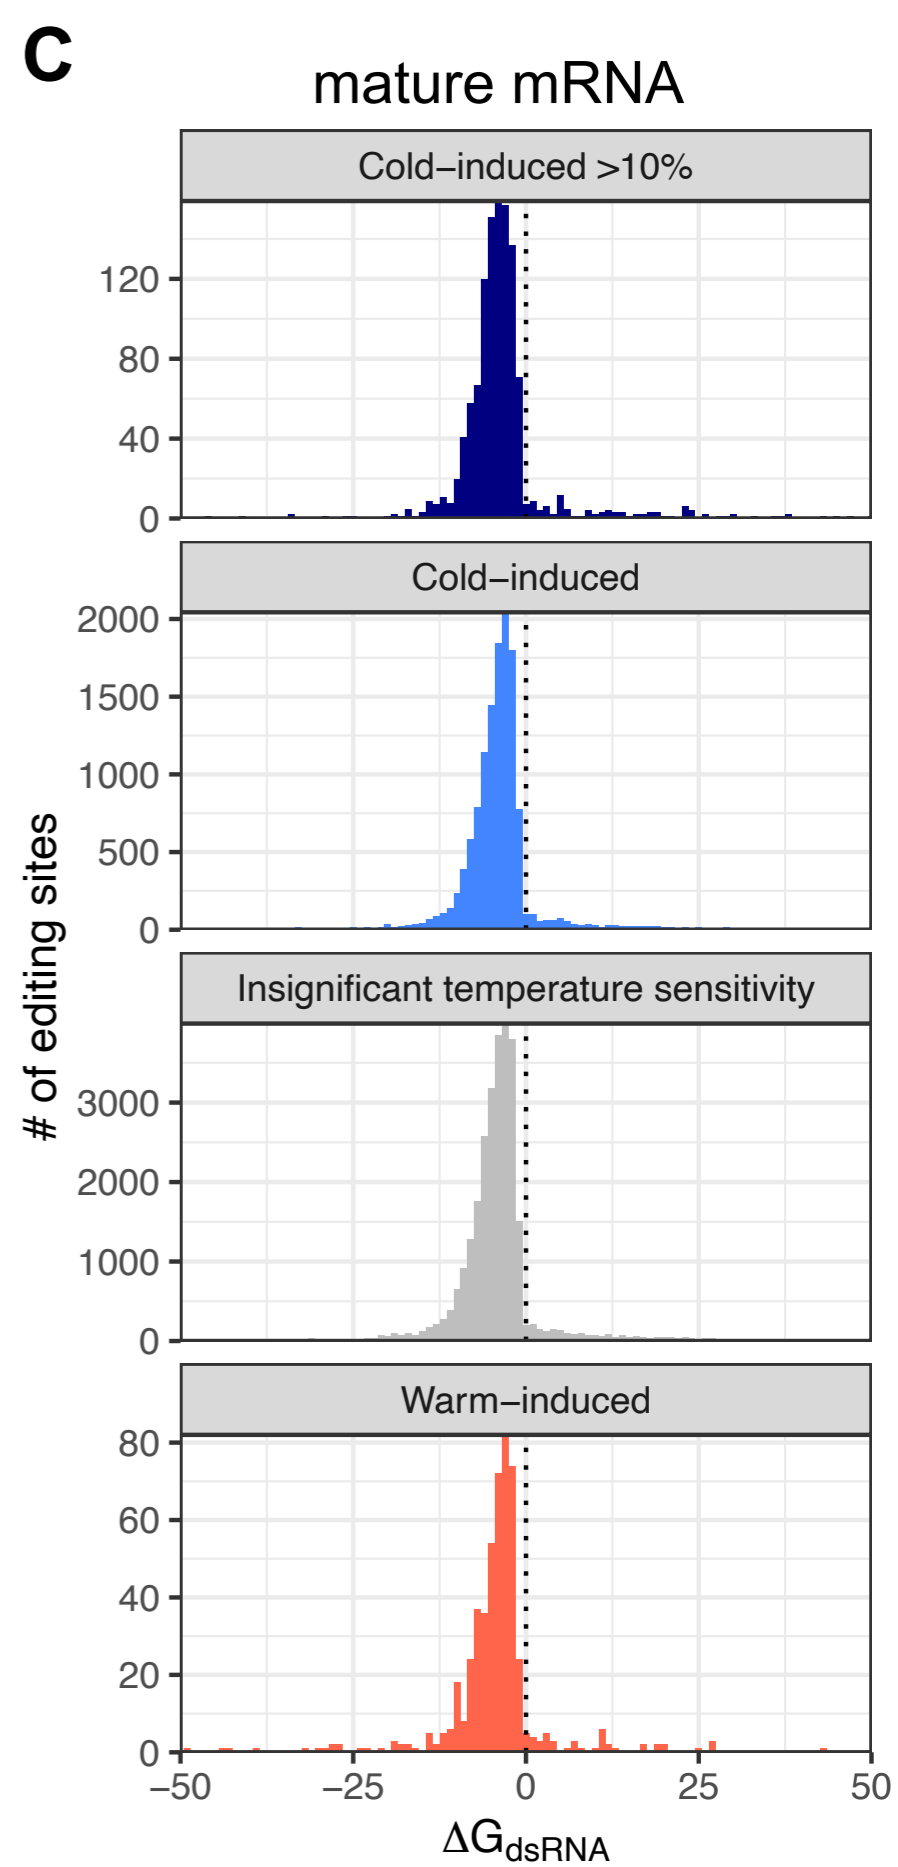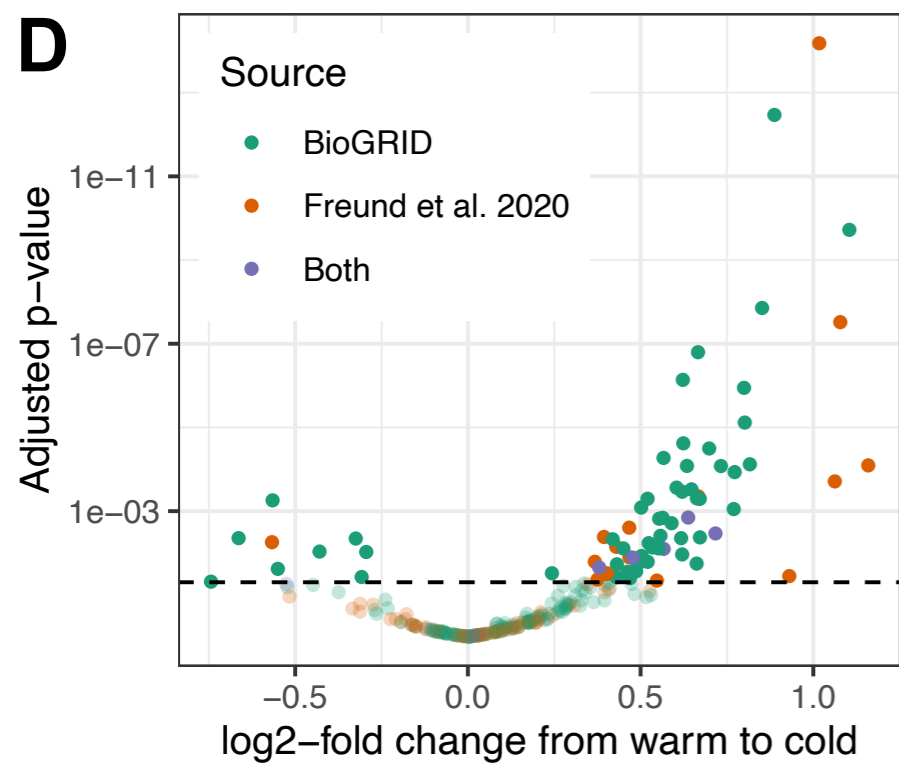

Supplement: NIHMS1906957-supplement-3.pdf [file NIHMS1906957-supplement-3.pdf]

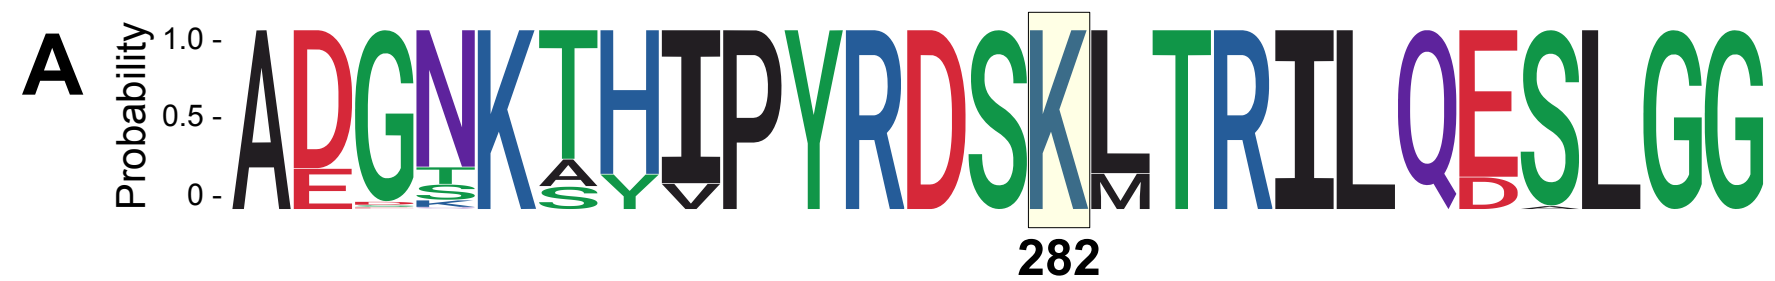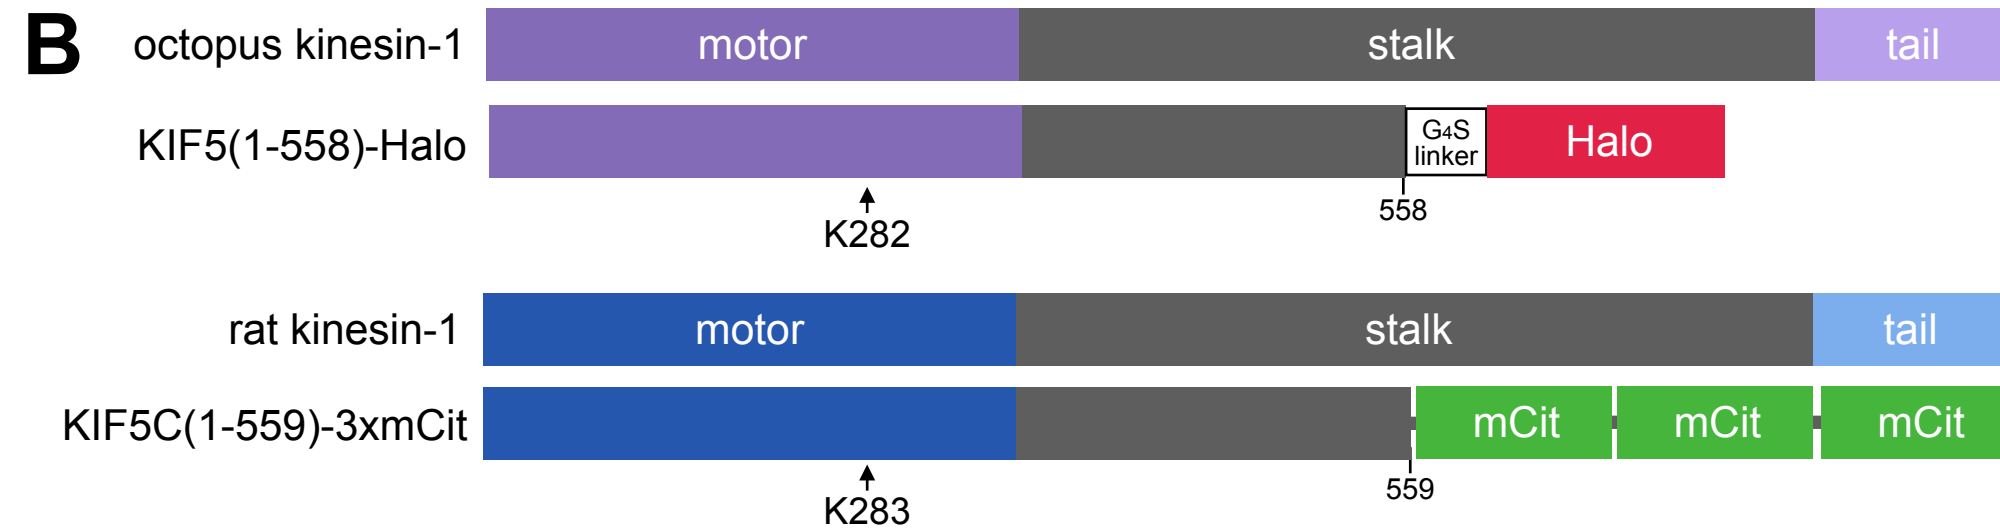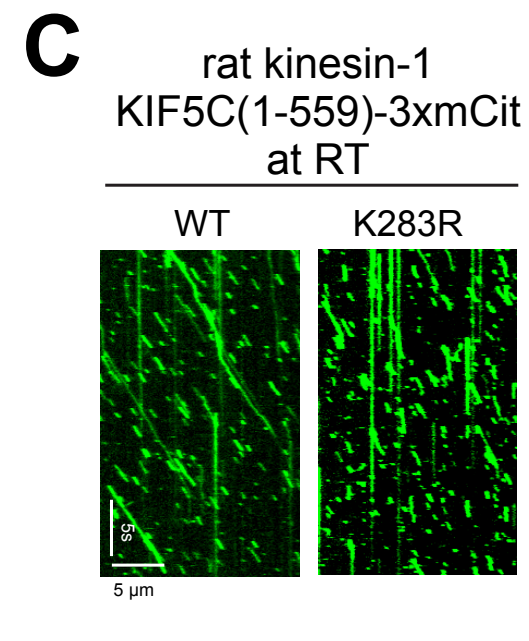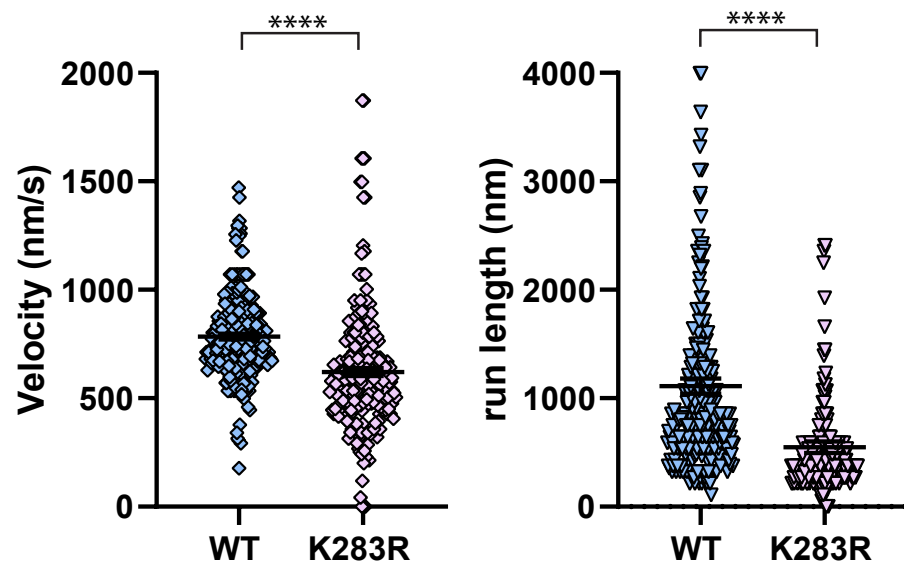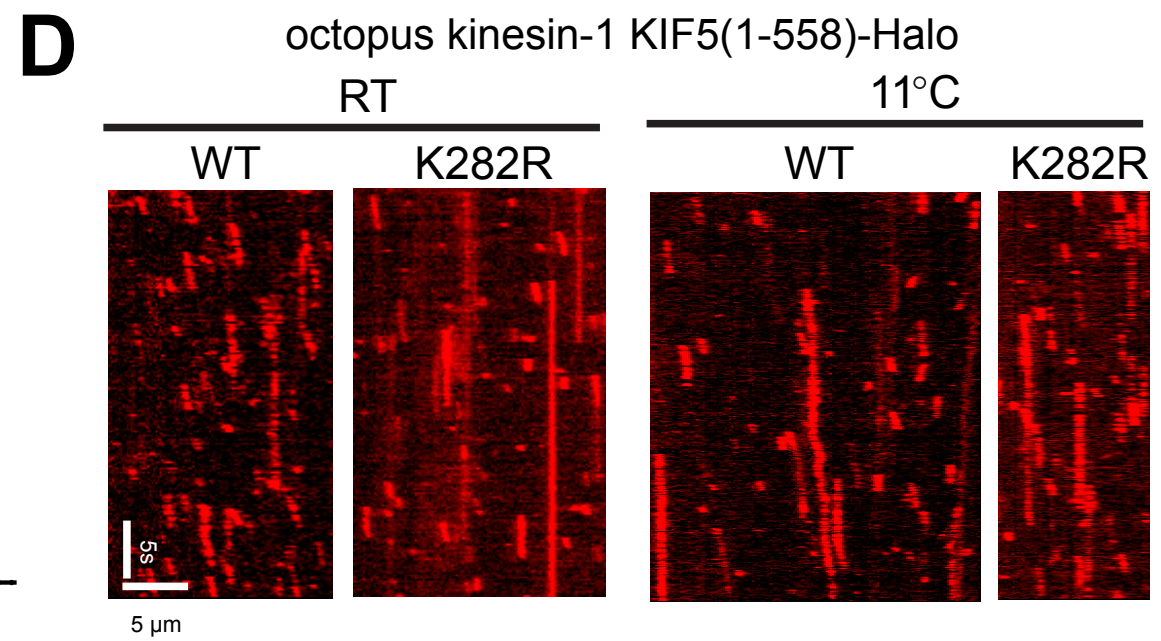

Supplement: NIHMS1906957-supplement-4.pdf [file NIHMS1906957-supplement-4.pdf]

Temperature (°C)

Feb 2020

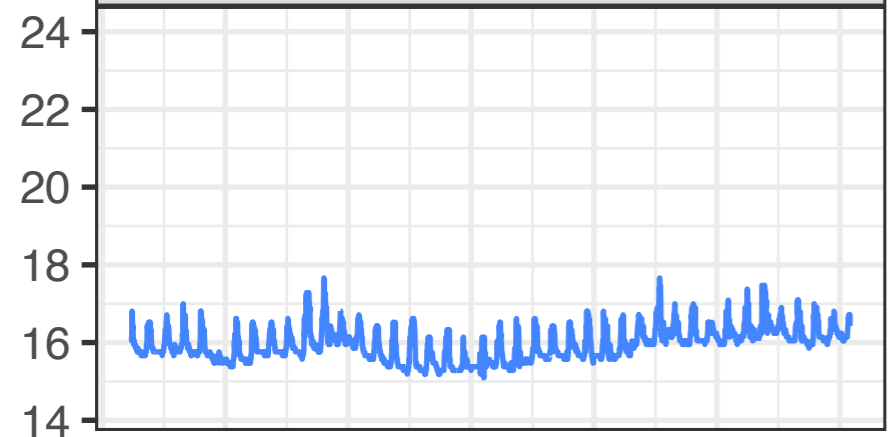

Feb 2022

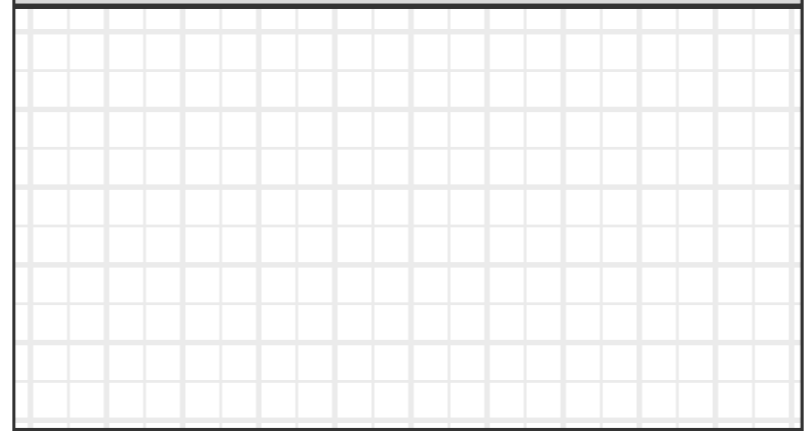

Sep 2019

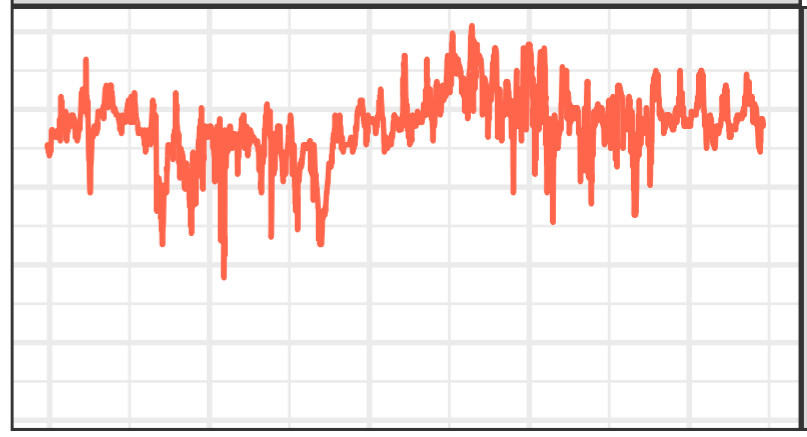

*O. bimaculatus*

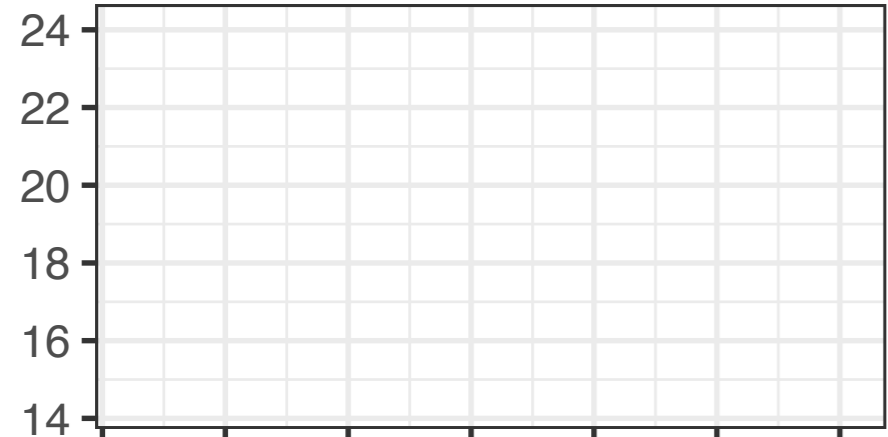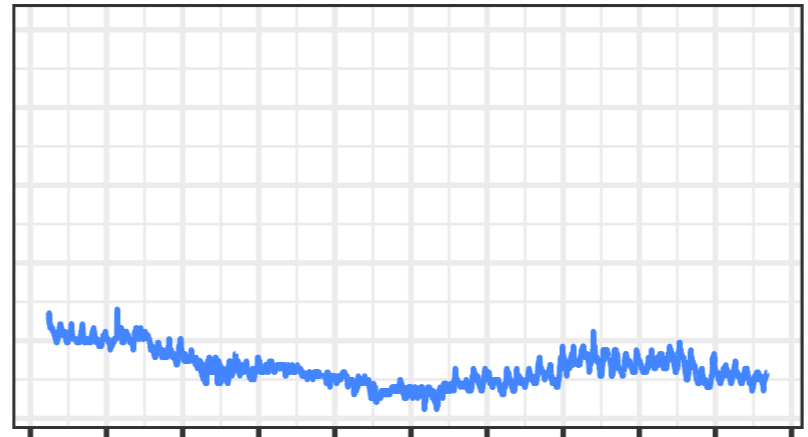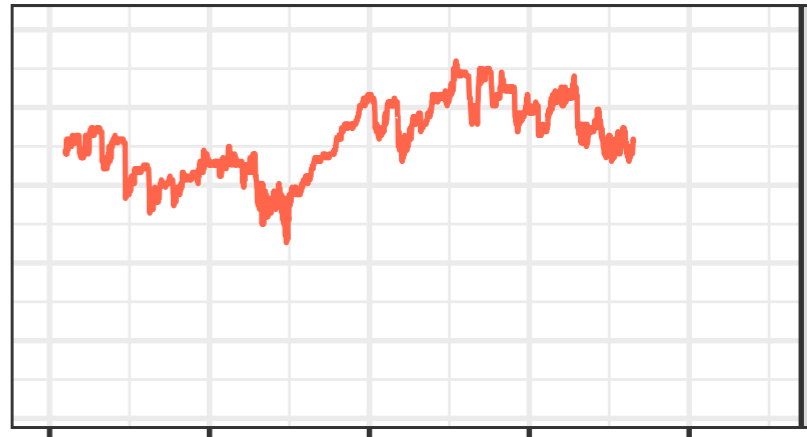

*O. bimaculoides*

2020-01-20 2020-01-27 2020-02-03 2020-02-10 2020-02-17 2020-02-24 2020-03-02 2021-03-11 2021-12-29 2021-12-06 2021-12-13 2021-12-20 2022-01-27 2022-01-03 2022-01-10 2022-01-17 2022-01-24 2022-01-31 2019-08-12 2019-08-19 2019-08-26 2019-09-02 2019-09-09

Supplement: NIHMS1906957-supplement-5.pdf [file NIHMS1906957-supplement-5.pdf]
